# Supplementary material
Source: PubMed Central journal article supplement (PMC4574256)
Supplement: 10.1534_115.177550_genetics.115.177550-2.pdf [file 10.1534_115.177550_genetics.115.177550-2.pdf]

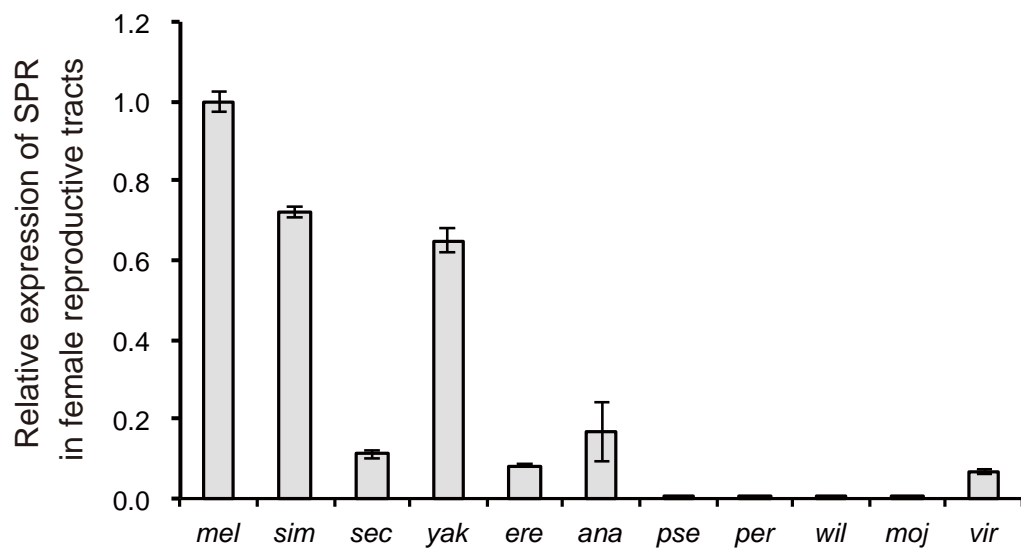

**Figure S4** Expression levels of SPR orthologs in the female reproductive organs of various *Drosophila* species. SPR was highly expressed in the *D. melanogaster* species group, but not in distant species, except for *D. virilis*.
