# Supplementary material
Source: PubMed Central journal article supplement (PMC4574256)
Supplement: 10.1534_115.177550_genetics.115.177550-3.pdf [file 10.1534_115.177550_genetics.115.177550-3.pdf]

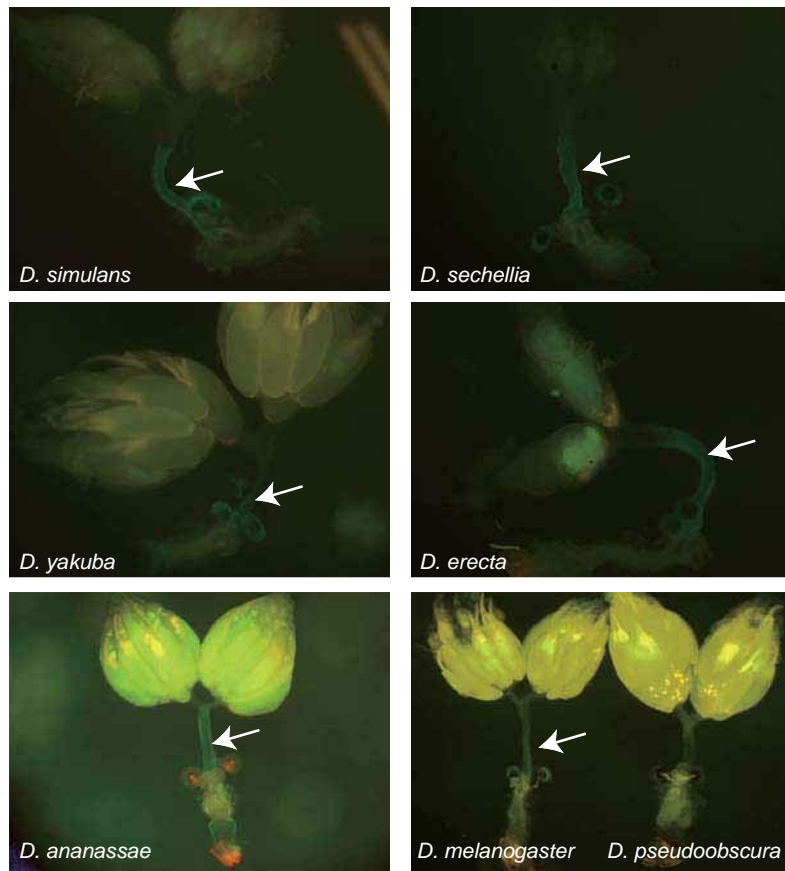

**Figure S3** G-SP-binding ability to female reproductive organs of various *Drosophila* species. Female reproductive organs from indicated *Drosophila* species were co-incubated with head homogenates of *GMR>G-SP* flies.
