# Supplementary material
Source: PubMed Central journal article supplement (PMC4574256)
Supplement: 10.1534_115.177550_genetics.115.177550-6.pdf [file 10.1534_115.177550_genetics.115.177550-6.pdf]

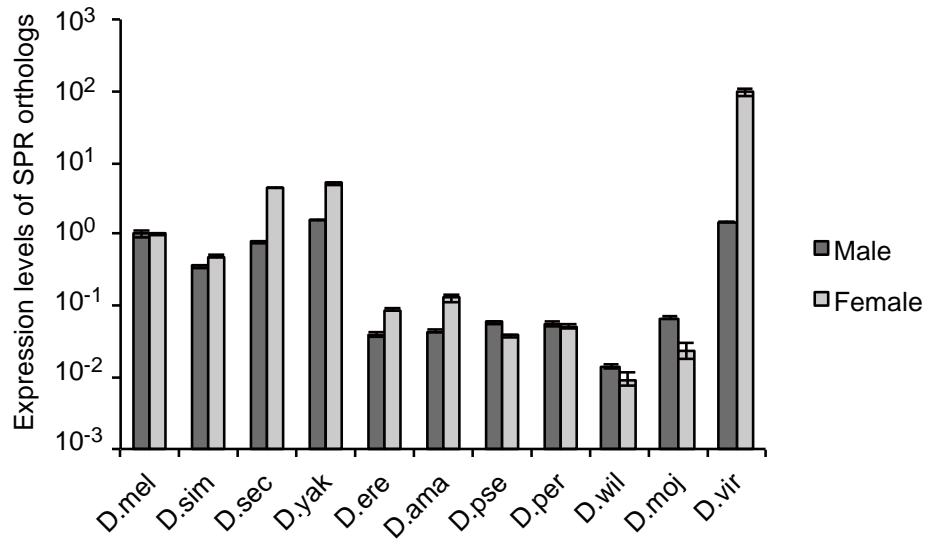

**Figure S5** Expression levels of SPR orthologs in whole-body of various *Drosophila* species. SPR was highly expressed in both sexes of all of *Drosophila* species we tested.
