# Supplementary material
Source: PubMed Central journal article supplement (PMC4574256)
Supplement: 10.1534_115.177550_genetics.115.177550-7.pdf [file 10.1534_115.177550_genetics.115.177550-7.pdf]

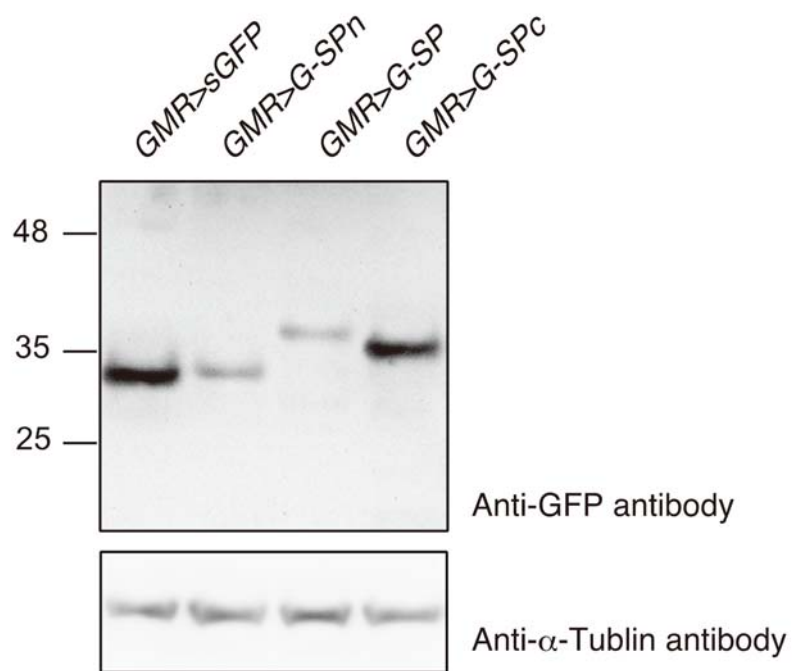

**Figure S1** Expression of the GFP-tagged SP proteins in flies. A series of the GFP tagged SPs were expressed in eye imaginal disc using GMR-GAL4. Three 4-day-old female flies were subjected to immunoblot analysis using an anti-GFP antibody. The GFP-tagged SP proteins (G-SPn, G-SP and G-SPc) or GFP alone (sGFP) were expressed as immunoreactive products with expected sizes.
